# Supplementary material for: Preparation of magnetic nanographene sorbent for extraction and quantification of targeted PPCPs in environmental water samples
Source: Royal Society of Chemistry journal article supplement (doi:10.1039/c6ra10675g), 2016-01-01
Supplement: c6ra10675g1.pdf [file c6ra10675g1.pdf]

**Table S1:** The central composite design and the corresponding responses obtained by the HPLC method for the studied PPCPs.

| Std | Run | Block   | Factor 1<br>A:mass of sorbent | Factor 2<br>B:des. vol | Factor 3<br>C:des. time | Response 1<br>R1 | Response 2<br>R2 | Response 3<br>R3 | Response 4<br>R4 | Response 5<br>R5 | Response 6<br>R6 | Response 7<br>R7 | Response 8<br>mean |
|-----|-----|---------|-------------------------------|------------------------|-------------------------|------------------|------------------|------------------|------------------|------------------|------------------|------------------|--------------------|
| 2   | 1   | Block 1 | 1.00                          | -1.00                  | -1.00                   | 571              | 443              | 466              | 81               | 62               | 103              | 262              | 0.760648           |
| 14  | 2   | Block 1 | 0.00                          | 0.00                   | 1.68                    | 664              | 499              | 511              | 80               | 39               | 135              | 291              | 0.789617           |
| 7   | 3   | Block 1 | -1.00                         | 1.00                   | 1.00                    | 543              | 430              | 471              | 21               | 28               | 109              | 288              | 0.566487           |
| 18  | 4   | Block 1 | 0.00                          | 0.00                   | 0.00                    | 730              | 455              | 487              | 96               | 53               | 134              | 291              | 0.840359           |
| 6   | 5   | Block 1 | 1.00                          | -1.00                  | 1.00                    | 506              | 395              | 424              | 52               | 35               | 61               | 162              | 0.543764           |
| 19  | 6   | Block 1 | 0.00                          | 0.00                   | 0.00                    | 666              | 486              | 509              | 84               | 64               | 149              | 361              | 0.889151           |
| 4   | 7   | Block 1 | 1.00                          | 1.00                   | -1.00                   | 587              | 440              | 458              | 77               | 41               | 102              | 275              | 0.716146           |
| 11  | 8   | Block 1 | 0.00                          | -1.68                  | 0.00                    | 508              | 388              | 411              | 74               | 24               | 91               | 251              | 0.606844           |
| 5   | 9   | Block 1 | -1.00                         | -1.00                  | 1.00                    | 549              | 431              | 459              | 93               | 43               | 125              | 274              | 0.752939           |
| 3   | 10  | Block 1 | -1.00                         | 1.00                   | -1.00                   | 514              | 414              | 449              | 30               | 13               | 128              | 278              | 0.53305            |
| 15  | 11  | Block 1 | 0.00                          | 0.00                   | 0.00                    | 754              | 464              | 531              | 68               | 55               | 146              | 373              | 0.860361           |
| 10  | 12  | Block 1 | 1.68                          | 0.00                   | 0.00                    | 649              | 472              | 473              | 65               | 45               | 123              | 277              | 0.749747           |
| 13  | 13  | Block 1 | 0.00                          | 0.00                   | -1.68                   | 547              | 414              | 430              | 62               | 29               | 115              | 282              | 0.656154           |
| 9   | 14  | Block 1 | -1.68                         | 0.00                   | 0.00                    | 321              | 297              | 359              | 32               | 16               | 107              | 229              | 0.453746           |
| 20  | 15  | Block 1 | 0.00                          | 0.00                   | 0.00                    | 712              | 440              | 449              | 74               | 45               | 139              | 314              | 0.78793            |
| 16  | 16  | Block 1 | 0.00                          | 0.00                   | 0.00                    | 690              | 470              | 481              | 80               | 49               | 132              | 359              | 0.828185           |
| 8   | 17  | Block 1 | 1.00                          | 1.00                   | 1.00                    | 671              | 477              | 491              | 38               | 90               | 127              | 315              | 0.793625           |
| 12  | 18  | Block 1 | 0.00                          | 1.68                   | 0.00                    | 678              | 564              | 504              | 46               | 27               | 141              | 333              | 0.723381           |
| 17  | 19  | Block 1 | 0.00                          | 0.00                   | 0.00                    | 680              | 467              | 479              | 66               | 48               | 137              | 333              | 0.796148           |
| 1   | 20  | Block 1 | -1.00                         | -1.00                  | -1.00                   | 524              | 318              | 417              | 46               | 47               | 131              | 183              | 0.614837           |

**Table S2:** The spiked concentration of different PPCPs in real samples for validation study

| Sample | Component ( $\mu\text{g L}^{-1}$ ) |       |       |     |     |      |       |
|--------|------------------------------------|-------|-------|-----|-----|------|-------|
|        | Et-P                               | Pro-P | But-P | DIC | Ibu | BZ-3 | 4-MBC |
| S1     | 1                                  | 1     | 1     | 2   | 4   | 2    | 2     |
| S2     | 2                                  | 2     | 2     | 3   | 8   | 4    | 3     |
| S3     | 4                                  | 4     | 4     | 4   | 15  | 8    | 4     |
| S4     | 10                                 | 10    | 10    | 10  | 25  | 20   | 10    |

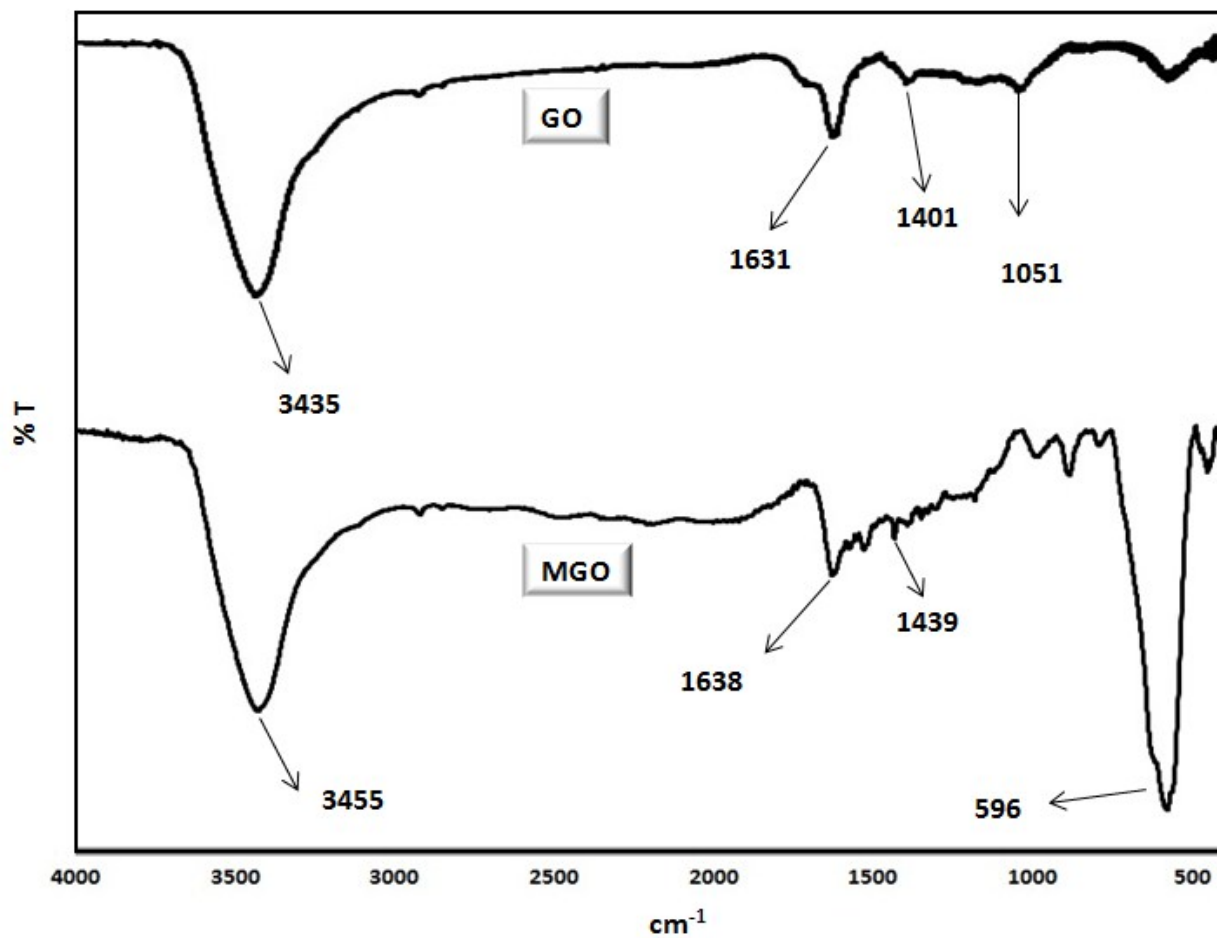

**Fig. S1:** FT-IR spectra of GO and MGO.

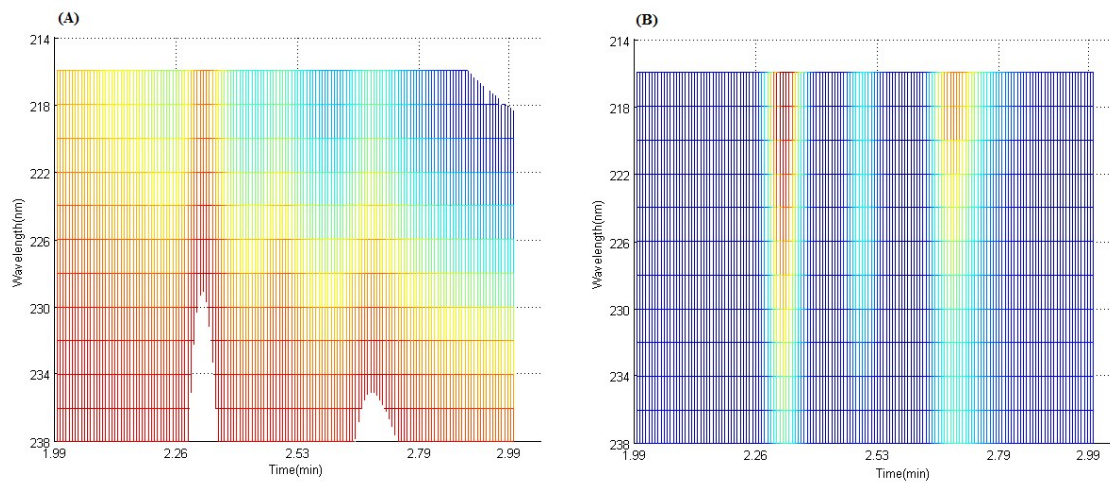

**Fig. S2:** Contour plots of matrix subset of corresponding to Ibu in spiked real sample: (A) before and (B) after background elimination.
